# Supplementary material for: High-resolution imagery acquired from an unmanned platform to estimate biophysical and geometrical parameters of olive trees under different irrigation regimes
Source: PubMed Central journal article supplement (PMC6342295; doi:10.1371/journal.pone.0210804), 2019-01-22

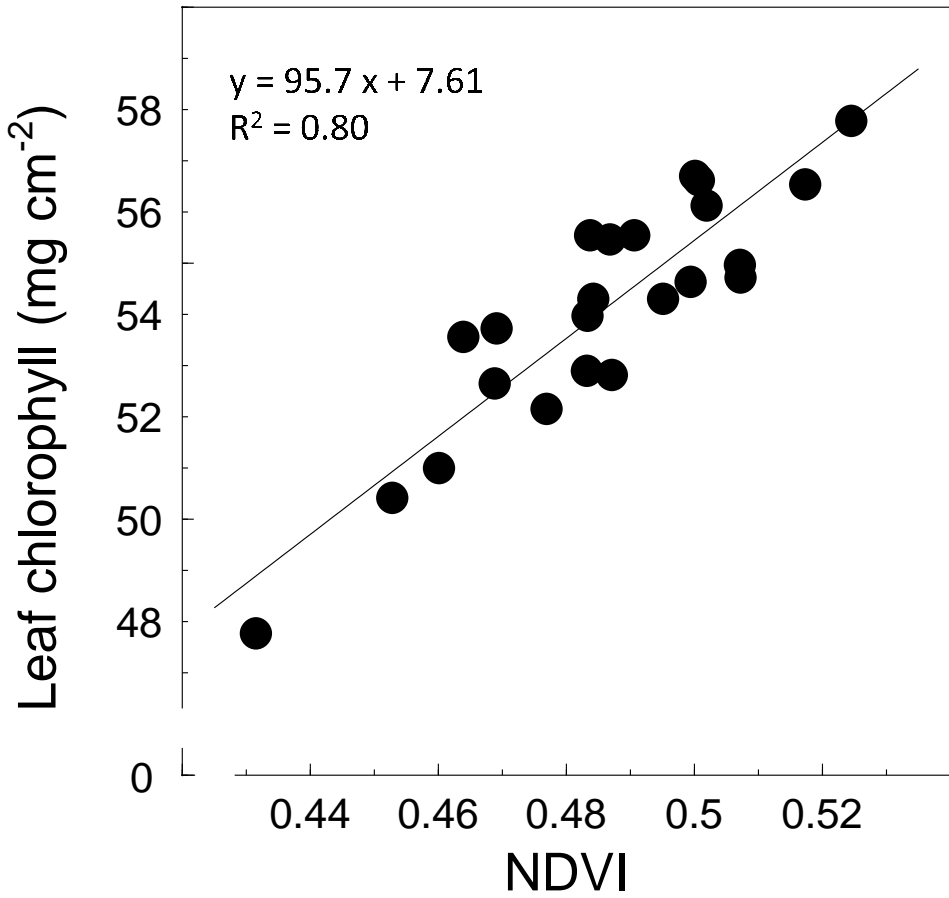

Supplement: pone.0210804.s002.pdf [file pone.0210804.s002.pdf]
